# Supplementary material for: In situ synthesis of high-loading Li4Ti5O12–graphene hybrid nanostructures for high rate lithium ion batteries
Source: Royal Society of Chemistry journal article supplement (doi:10.1039/c0nr00639d), 2010-11-12
Supplement: c0nr00639d.pdf [file c0nr00639d.pdf]

## Electronic Supplementary Information (ESI)

### ***In situ* synthesis of high-loading Li<sub>4</sub>Ti<sub>5</sub>O<sub>12</sub>-graphene hybrid nanostructures for high rate lithium ion batteries**

Laifa Shen,<sup>a</sup> Changzhou Yuan,<sup>b</sup> Hongjun Luo,<sup>a</sup> Xiaogang Zhang,<sup>\*a</sup> Sudong Yang<sup>a</sup> and Xiangjun Lu<sup>a</sup>

<sup>a</sup> College of Material Science & Engineering, Nanjing University of Aeronautics and Astronautics, Nanjing, 210016, P.R. China.

<sup>b</sup> School of materials Science and Engineering, Anhui University of technology, Ma`anshan, 243002, P.R. China.

E-mail: [azhangxg@163.com](mailto:azhangxg@163.com)

### Experimental

#### 1. Preparation of Li<sub>4</sub>Ti<sub>5</sub>O<sub>12</sub>/GNS nanocomposites:

All the reagents were of analytical grade purity and used as received. Graphite oxide (GO) was synthesized from natural graphite powders (SP-1, Sinopharm Chemical Reagent Co., Ltd, China) by a modified Hummers method originally reported by Kovtyukhova *et al.*,<sup>1</sup> in which pre-oxidation of graphite is followed by oxidation with Hummers' method. In a typical synthesis, 250 mg GO was dissolved into 200 mL ethanol with sonicating for 4 h. Then 2.5 ml tetrabutyl titanate was added drop-by-drop into the suspension and the mixture was magnetically stirred for 30 min followed by the addition of 2.5 ml H<sub>2</sub>O. After being further stirred for 30 min, the mixture was refluxed at 90 °C for 8 h. After the reaction, the suspension and precipitate were separated by centrifugation, washed with deionized water and ethanol and dried at 60 °C for 12 h. Following synthesis, an amount of 0.4 g TiO<sub>2</sub>/GO was dispersed in a 2.5 M LiOH aqueous solution, the hydrazine hydrate (85 %) as reductant was added in the above solution and stirred for 5 min. The suspension was transferred into Teflon-lined stainless steel autoclave and kept at 100 °C for 10 h. The precipitate was separated by filtration, washed with deionized water several times to remove an excess of hydroxides before drying at 60 °C for 12 h. Subsequently, the as-prepared Li<sub>4</sub>Ti<sub>5</sub>O<sub>12</sub>-precursor anchored on GNS was calcined at 600 °C under N<sub>2</sub> for 2 h to obtain crystalline Li<sub>4</sub>Ti<sub>5</sub>O<sub>12</sub>/GNS. The process for preparing pure Li<sub>4</sub>Ti<sub>5</sub>O<sub>12</sub> was similar to that of Li<sub>4</sub>Ti<sub>5</sub>O<sub>12</sub>/GNS preparation, except without the GO in the first stage.

#### 2. Sample characterization:

The crystal structure of the obtained samples was characterized by X-ray diffraction (XRD) (Bruker D8 advance) with Cu K $\alpha$  radiation. Microstructural properties were obtained using a transmission electron microscopy (TEM, FEI, Tecnai-20) and high-resolution transmission electron microscopic (HRTEM, JEOL JEM-2010), and

field emission scanning electron microscopy (FESEM LEO 1430VP), and atomic force microscopy (AFM, Seiko Instrument, SPA-300HV). TG was performed on a TG-DSC instrument (NETZSCH STA 409 PC) using a heating rate of  $10\text{ }^{\circ}\text{C min}^{-1}$  in air atmosphere from 40 to  $900\text{ }^{\circ}\text{C}$ . Raman spectra were collected using a Renishaw 2000 system with an argon ion laser (514.5 nm) and charge-coupled device detector. The electronic conductivities of the samples were measured by a four-point probe method (SDY-5 Four-Point probe meter).

### 3. Electrochemical experiments:

The electrochemical characterization was carried out by galvanostatic cycling in a CR2016-type coin cell. The raw  $\text{Li}_4\text{Ti}_5\text{O}_{12}$  electrode was prepared by mixing 76 wt.% active material, 14 wt.% carbon black, and 10 wt.% polyvinylidene fluoride (PVDF) in *N*-methyl pyrrolidinone (NMP). While the  $\text{Li}_4\text{Ti}_5\text{O}_{12}$ /GNS electrode was prepared by mixing 90 wt.% composite and 10 wt.% PVDF in NMP in order to match the carbon content of the raw  $\text{Li}_4\text{Ti}_5\text{O}_{12}$  electrodes (The content of  $\text{Li}_4\text{Ti}_5\text{O}_{12}$  in the composite electrode is 76 %). Then the slurry was spread uniformly on aluminium foil current collector. Finally, the electrode was dried under vacuum at  $110\text{ }^{\circ}\text{C}$  for 12 h. Test cells were assembled in an argon-filled glove box using Li foil as the counter electrode and polypropylene (PP) film as the separator.  $1\text{ mol L}^{-1}$   $\text{LiPF}_6$  solution in a 1 : 1 (V : V) mixture of ethylene carbonate (EC) and dimethyl carbonate (DMC) was used as electrolyte. The coin cells were galvanostatically charged- discharged at different current densities between 1.0 and 2.5 V (vs.  $\text{Li/Li}^+$ ) using a CT2001A cell test instrument (LAND Electronic Co.). The AC impedance spectrum was measured by using a Solatron 1260 Impedance Analyzer in the frequency range  $10^{-2}$ - $10^6$  Hz.

### Sample Characterizations

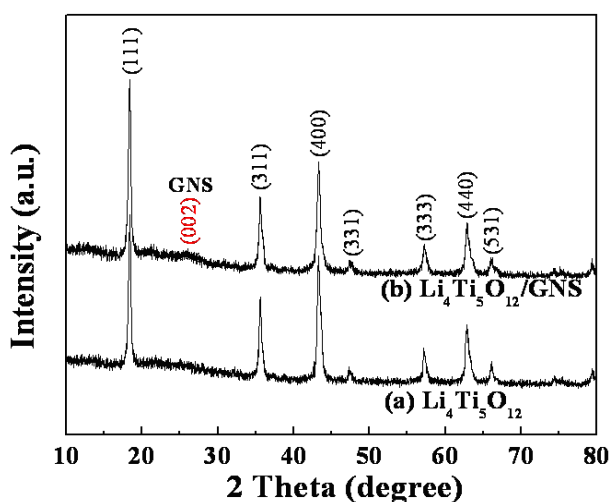

**Fig. S1** XRD patterns of (a) the pure  $\text{Li}_4\text{Ti}_5\text{O}_{12}$  prepared without the presence of GNS and (b)  $\text{Li}_4\text{Ti}_5\text{O}_{12}$ /GNS nanocomposites.

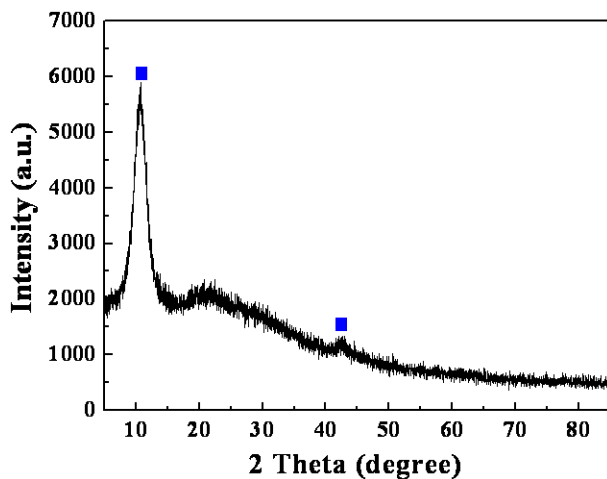

Fig. S2 XRD pattern of graphite oxide

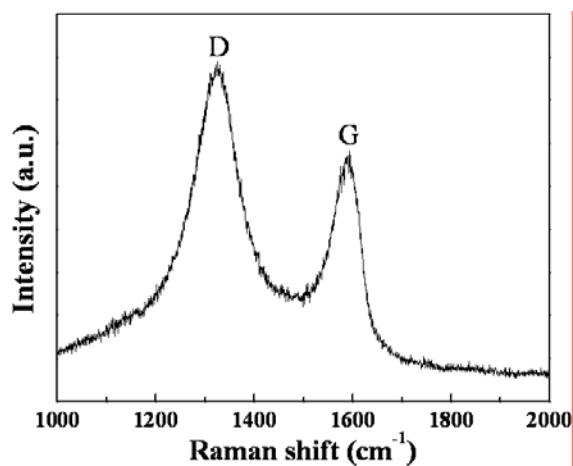

Fig. S3 Raman spectra of the  $\text{Li}_4\text{Ti}_5\text{O}_{12}/\text{GNS}$  nanocomposites.

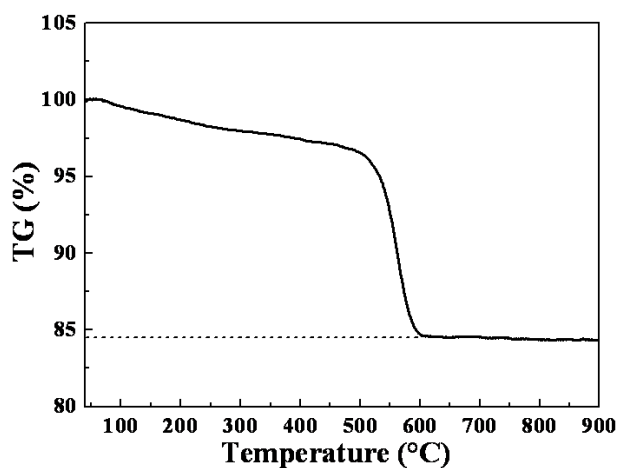

Fig. S4 TG curve of the  $\text{Li}_4\text{Ti}_5\text{O}_{12}/\text{GNS}$  nanocomposites at  $10\text{ °C min}^{-1}$  under air. The residual weight ratio corresponds to the content of  $\text{Li}_4\text{Ti}_5\text{O}_{12}$  in the hybrid materials.

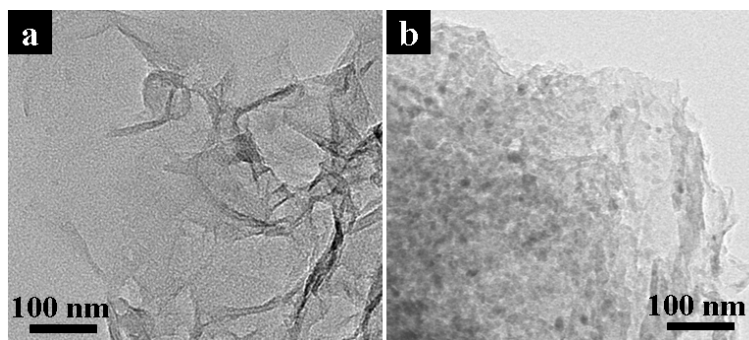

**Fig. S5** TEM images of (a) GNS and (b) TiO<sub>2</sub>/GO

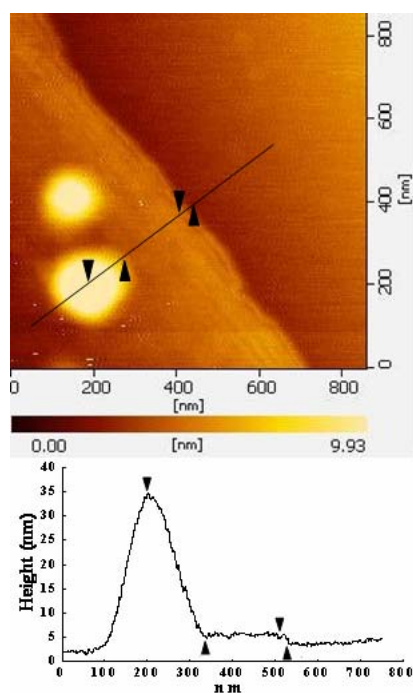

**Fig. S6** AFM image of Li<sub>4</sub>Ti<sub>5</sub>O<sub>12</sub> NPs anchored on GNS. The line scan shows the peaks arising from Li<sub>4</sub>Ti<sub>5</sub>O<sub>12</sub> NPs and the height of GNS.

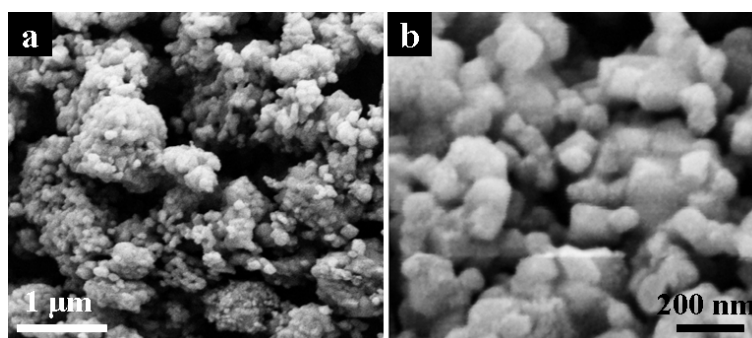

**Fig. S7** Typical FESEM images of Li<sub>4</sub>Ti<sub>5</sub>O<sub>12</sub> sample synthesized under the control experiment in the absence of graphene sheets.

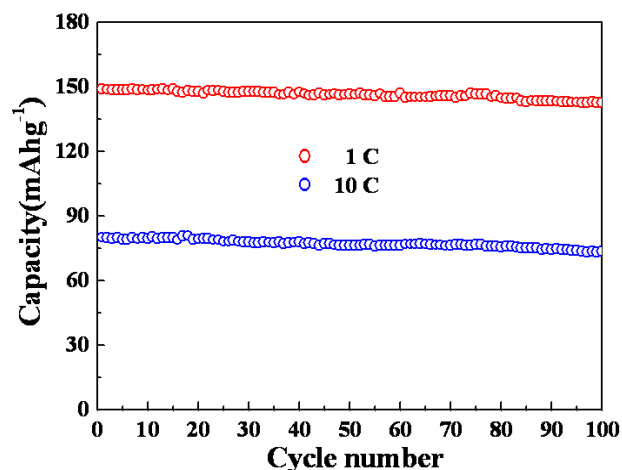

**Fig. S8** Cycle performance of the pure  $\text{Li}_4\text{Ti}_5\text{O}_{12}$  electrode under different current densities.

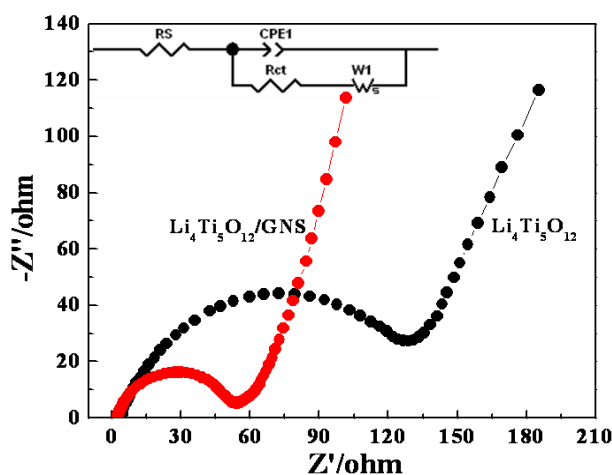

**Fig. S9** Electrochemical impedance spectra of the pure  $\text{Li}_4\text{Ti}_5\text{O}_{12}$  and  $\text{Li}_4\text{Ti}_5\text{O}_{12}/\text{GNS}$  nanocomposites electrodes at the voltage of 1.55 V.

**Table 1** Impedance parameters of the  $\text{Li}_4\text{Ti}_5\text{O}_{12}$  and  $\text{Li}_4\text{Ti}_5\text{O}_{12}/\text{GNS}$  nanocomposites electrodes.

| Samples                                          | $R_s$ ( $\Omega$ ) | $R_{ct}$ ( $\Omega$ ) | $i^0$ ( $\text{mA cm}^{-2}$ ) |
|--------------------------------------------------|--------------------|-----------------------|-------------------------------|
| $\text{Li}_4\text{Ti}_5\text{O}_{12}$            | 4.1                | 126.1                 | 0.20                          |
| $\text{Li}_4\text{Ti}_5\text{O}_{12}/\text{GNS}$ | 2.6                | 52.9                  | 0.49                          |

## References

1. N. I. Kovtyukhova, P. J. Ollivier, B. R. Martin, T. E. Mallouk, S. A. Chizhik, E. V. Buzaneva and A. D. Gorchinskiy, *Chem. Mater.*, 1999, 11, 771-778.
